# Supplementary material for: Lung Disease Network Reveals the Impact of Comorbidity on SARS-CoV-2 Infection and Opportunities of Drug Repurposing
Source: Research Square preprint supplement (doi:10.21203/rs.3.rs-121999/v1), 2020-12-10
Supplement: Supplementary file 1 [file b558ba9c89412e2fe2a80d66.xlsx]

## Sheet: Supp Table8,9
Supplementary table 8 : Targets in functional protein modules and drugs from DrugBank database							Supplementary table 9: proximity between targets and COVID-19 disease module
Target Name	Gene Name(symbol)	Module	Drug IDs	drug_name			S.No.	Gene symbol	z-score	module
Multidrug resistance-associated protein 1	ABCC1	module4	DB01138	Sulfinpyrazone			1	HBB	-3.15697	module 1
Multidrug resistance-associated protein 1	ABCC1	module4	DB06176	Romidepsin			2	HDAC11	-2.86248	module 1
5'-AMP-activated protein kinase subunit beta-1	PRKAB1	module1	DB00331	Metformin			3	HDAC5	-2.61472	module 1
72 kDa type IV collagenase	MMP2	module2	DB00786	Marimastat			4	HDAC8	-3.16174	module 1
Amiloride-sensitive sodium channel subunit alpha	SCNN1A	module1	DB00384	Triamterene			5	HDAC9	-3.03804	module 1
Amiloride-sensitive sodium channel subunit alpha	SCNN1A	module1	DB00594	Amiloride			6	ICAM1	-2.85538	module 1
Amyloid beta A4 protein	APP	module3	DB09151	Flutemetamol (18F)			7	IMPDH1	-3.31595	module 1
Amyloid beta A4 protein	APP	module3	DB09149	Florbetapir (18F)			8	IMPDH2	-4.64576	module 1
Amyloid beta A4 protein	APP	module3	DB09148	Florbetaben (18F)			9	KCND3	-3.18282	module 1
Antithrombin-III	SERPINC1	module2	DB06822	Tinzaparin			10	MAPK3	-2.86078	module 1
Antithrombin-III	SERPINC1	module2	DB08813	Nadroparin			11	MME	-2.98221	module 1
Antithrombin-III	SERPINC1	module2	DB01109	Heparin			12	NFKB2	-2.92128	module 1
Antithrombin-III	SERPINC1	module2	DB00569	Fondaparinux			13	NTRK1	-2.61655	module 1
Antithrombin-III	SERPINC1	module2	DB01225	Enoxaparin			14	PRKAB1	-2.84439	module 1
Antithrombin-III	SERPINC1	module2	DB06779	Dalteparin			15	SCNN1A	-3.23282	module 1
ATP-binding cassette sub-family G member 2	ABCG2	module3	DB04851	Biricodar			16	SIRT5	-5.00902	module 1
ATP-binding cassette sub-family G member 2	ABCG2	module3	DB11995	Avatrombopag			17	TOP1	-2.9276	module 1
Beta-2 adrenergic receptor	ADRB2	module2	DB09082	Vilanterol			18	TOP1MT	-3.34554	module 1
Beta-2 adrenergic receptor	ADRB2	module2	DB00871	Terbutaline			19	XPO1	-2.60747	module 1
Beta-2 adrenergic receptor	ADRB2	module2	DB00938	Salmeterol			20	ESR1	-2.49772	module 1
Beta-2 adrenergic receptor	ADRB2	module2	DB01001	Salbutamol			21	ESR2	-2.50679	module 1
Beta-2 adrenergic receptor	ADRB2	module2	DB00867	Ritodrine			22	EZH2	-2.52066	module 1
Beta-2 adrenergic receptor	ADRB2	module2	DB11124	Racepinephrine			23	ADRB2	-2.76989	module2
Beta-2 adrenergic receptor	ADRB2	module2	DB06814	Protokylol			24	ATP1A1	-3.00245	module2
Beta-2 adrenergic receptor	ADRB2	module2	DB01366	Procaterol			25	COMT	-4.94985	module2
Beta-2 adrenergic receptor	ADRB2	module2	DB01291	Pirbuterol			26	CYP2D6	-3.33171	module2
Beta-2 adrenergic receptor	ADRB2	module2	DB00816	Orciprenaline			27	CYP2E1	-3.32849	module2
Beta-2 adrenergic receptor	ADRB2	module2	DB09080	Olodaterol			28	DBH	-3.31363	module2
Beta-2 adrenergic receptor	ADRB2	module2	DB01214	Metipranolol			29	EGFR	-2.61288	module2
Beta-2 adrenergic receptor	ADRB2	module2	DB13139	Levosalbutamol			30	F10	-3.33594	module2
Beta-2 adrenergic receptor	ADRB2	module2	DB01210	Levobunolol			31	FLT4	-3.27311	module2
Beta-2 adrenergic receptor	ADRB2	module2	DB05039	Indacaterol			32	HSD11B1	-3.31389	module2
Beta-2 adrenergic receptor	ADRB2	module2	DB00983	Formoterol			33	MMP2	-3.28965	module2
Beta-2 adrenergic receptor	ADRB2	module2	DB01288	Fenoterol			34	PLAT	-4.97582	module2
Beta-2 adrenergic receptor	ADRB2	module2	DB11587	Etafedrine			35	PRDX5	-3.27568	module2
Beta-2 adrenergic receptor	ADRB2	module2	DB01407	Clenbuterol			36	PRKCD	-2.98064	module2
Beta-2 adrenergic receptor	ADRB2	module2	DB00521	Carteolol			37	PTGFR	-3.32748	module2
Beta-2 adrenergic receptor	ADRB2	module2	DB01274	Arformoterol			38	SERPINC1	-3.32509	module2
Beta-2 adrenergic receptor	ADRB2	module2	DB01118	Amiodarone			39	SRC	-2.84615	module2
Calcium-transporting ATPase type 2C member 1	ATP2C1	module3	DB00228	Enflurane			40	ABCG2	-3.34417	module3
Catechol O-methyltransferase	COMT	module2	DB11632	Opicapone			41	APP	-3.34167	module3
Catechol O-methyltransferase	COMT	module2	DB00494	Entacapone			42	ATP2C1	-3.32572	module3
Coagulation factor X	F10	module2	DB06228	Rivaroxaban			43	ATP6V1B2	-3.23037	module3
Coagulation factor X	F10	module2	DB01109	Heparin			44	CACNA2D1	-3.26657	module3
Coagulation factor X	F10	module2	DB00569	Fondaparinux			45	GSTM1	-3.34004	module3
Coagulation factor X	F10	module2	DB01225	Enoxaparin			46	KCNN4	-3.32648	module3
Coagulation factor X	F10	module2	DB09075	Edoxaban			47	PPIA	-2.97222	module3
Coagulation factor X	F10	module2	DB12364	Betrixaban			48	SOAT1	-3.24229	module3
Coagulation factor X	F10	module2	DB09258	Bemiparin			49	TFRC	-3.03196	module3
Coagulation factor X	F10	module2	DB06605	Apixaban			50	ABCC1	-5.05542	module4
Corticosteroid 11-beta-dehydrogenase isozyme 1	HSD11B1	module2	DB13751	Glycyrrhizic acid			51	ERBB4	-3.08863	module4
Cytochrome P450 2D6	CYP2D6	module2	DB11994	Diacerein			52	HDAC7	-3.02797	module4
Cytochrome P450 2E1	CYP2E1	module2	DB11994	Diacerein			53	MAPT	-3.01717	module4
DNA topoisomerase 1	TOP1	module1	DB01030	Topotecan			54	PRKCI	-3.00843	module4
DNA topoisomerase 1	TOP1	module1	DB05630	Sodium stibogluconate			55	PTGER3	-2.93269	module4
DNA topoisomerase 1	TOP1	module1	DB00762	Irinotecan			56	SIGMAR1	-5.035	module4
DNA topoisomerase I, mitochondrial	TOP1MT	module1	DB00762	Irinotecan
Dopamine beta-hydroxylase	DBH	module2	DB00988	Dopamine
Dopamine beta-hydroxylase	DBH	module2	DB00822	Disulfiram
Epidermal growth factor receptor	EGFR	module2	DB09330	Osimertinib
Epidermal growth factor receptor	EGFR	module2	DB11828	Neratinib
Epidermal growth factor receptor	EGFR	module2	DB01259	Lapatinib
Epidermal growth factor receptor	EGFR	module2	DB00317	Gefitinib
Epidermal growth factor receptor	EGFR	module2	DB00530	Erlotinib
Epidermal growth factor receptor	EGFR	module2	DB11963	Dacomitinib
Epidermal growth factor receptor	EGFR	module2	DB12267	Brigatinib
Epidermal growth factor receptor	EGFR	module2	DB08916	Afatinib
Estrogen receptor	ESR1	module1	DB09070	Tibolone
Estrogen receptor	ESR1	module1	DB00675	Tamoxifen
Estrogen receptor	ESR1	module1	DB09318	Synthetic Conjugated Estrogens, B
Estrogen receptor	ESR1	module1	DB09317	Synthetic Conjugated Estrogens, A
Estrogen receptor	ESR1	module1	DB00481	Raloxifene
Estrogen receptor	ESR1	module1	DB04575	Quinestrol
Estrogen receptor	ESR1	module1	DB09369	Polyestradiol phosphate
Estrogen receptor	ESR1	module1	DB04938	Ospemifene
Estrogen receptor	ESR1	module1	DB01357	Mestranol
Estrogen receptor	ESR1	module1	DB06202	Lasofoxifene
Estrogen receptor	ESR1	module1	DB00947	Fulvestrant
Estrogen receptor	ESR1	module1	DB00255	Diethylstilbestrol
Estrogen receptor	ESR1	module1	DB00890	Dienestrol
Estrogen receptor	ESR1	module1	DB01406	Danazol
Estrogen receptor	ESR1	module1	DB00286	Conjugated estrogens
Estrogen receptor	ESR1	module1	DB00882	Clomifene
Estrogen receptor	ESR1	module1	DB06401	Bazedoxifene
Estrogen receptor beta	ESR2	module1	DB00675	Tamoxifen
Estrogen receptor beta	ESR2	module1	DB00481	Raloxifene
Estrogen receptor beta	ESR2	module1	DB06202	Lasofoxifene
Estrogen receptor beta	ESR2	module1	DB00255	Diethylstilbestrol
Estrogen receptor beta	ESR2	module1	DB00286	Conjugated estrogens
Exportin-1	XPO1	module1	DB11942	Selinexor
Glutathione S-transferase Mu 1	GSTM1	module3	DB00608	Chloroquine
Hemoglobin subunit beta	HBB	module1	DB09112	Nitrous acid
Hemoglobin subunit beta	HBB	module1	DB13995	Ferric pyrophosphate citrate
High affinity nerve growth factor receptor	NTRK1	module1	DB08896	Regorafenib
High affinity nerve growth factor receptor	NTRK1	module1	DB14723	Larotrectinib
High affinity nerve growth factor receptor	NTRK1	module1	DB11986	Entrectinib
Histone deacetylase 11	HDAC11	module1	DB05015	Belinostat
Histone deacetylase 5	HDAC5	module1	DB06603	Panobinostat
Histone deacetylase 5	HDAC5	module1	DB05015	Belinostat
Histone deacetylase 7	HDAC7	module4	DB06603	Panobinostat
Histone deacetylase 7	HDAC7	module4	DB05015	Belinostat
Histone deacetylase 8	HDAC8	module1	DB06603	Panobinostat
Histone deacetylase 8	HDAC8	module1	DB05015	Belinostat
Histone deacetylase 9	HDAC9	module1	DB00313	Valproic acid
Histone deacetylase 9	HDAC9	module1	DB06603	Panobinostat
Histone deacetylase 9	HDAC9	module1	DB05015	Belinostat
Histone-lysine N-methyltransferase EZH2	EZH2	module1	DB12887	Tazemetostat
Histone-lysine N-methyltransferase EZH2	EZH2	module1	DB14581	CPI-1205
Inosine-5'-monophosphate dehydrogenase 1	IMPDH1	module1	DB00688	Mycophenolate mofetil
Inosine-5'-monophosphate dehydrogenase 2	IMPDH2	module1	DB00688	Mycophenolate mofetil
Intercellular adhesion molecule 1	ICAM1	module1	DB08818	Hyaluronic acid
Intermediate conductance calcium-activated potassium channel protein 4	KCNN4	module3	DB09089	Trimebutine
Intermediate conductance calcium-activated potassium channel protein 4	KCNN4	module3	DB00257	Clotrimazole
Microtubule-associated protein tau	MAPT	module4	DB01229	Paclitaxel
Microtubule-associated protein tau	MAPT	module4	DB01248	Docetaxel
Mitogen-activated protein kinase 3	MAPK3	module1	DB01169	Arsenic trioxide
Multidrug resistance-associated protein 1	ABCC1	module4	DB04851	Biricodar
NAD-dependent protein deacylase sirtuin-5, mitochondrial	SIRT5	module1	DB04786	Suramin
Neprilysin	MME	module1	DB09292	Sacubitril
Neprilysin	MME	module1	DB00886	Omapatrilat
Nuclear factor NF-kappa-B p100 subunit	NFKB2	module1	DB13751	Glycyrrhizic acid
Peptidyl-prolyl cis-trans isomerase A	PPIA	module3	DB00091	Cyclosporine
Peroxiredoxin-5, mitochondrial	PRDX5	module2	DB00995	Auranofin
Potassium voltage-gated channel subfamily D member 3	KCND3	module1	DB06217	Vernakalant
Potassium voltage-gated channel subfamily D member 3	KCND3	module1	DB04855	Dronedarone
Potassium voltage-gated channel subfamily D member 3	KCND3	module1	DB06637	Dalfampridine
Prostaglandin E2 receptor EP3 subtype	PTGER3	module4	DB00929	Misoprostol
Prostaglandin E2 receptor EP3 subtype	PTGER3	module4	DB00917	Dinoprostone
Prostaglandin E2 receptor EP3 subtype	PTGER3	module4	DB00905	Bimatoprost
Prostaglandin F2-alpha receptor	PTGFR	module2	DB00287	Travoprost
Prostaglandin F2-alpha receptor	PTGFR	module2	DB08819	Tafluprost
Prostaglandin F2-alpha receptor	PTGFR	module2	DB11660	Latanoprostene bunod
Prostaglandin F2-alpha receptor	PTGFR	module2	DB00654	Latanoprost
Prostaglandin F2-alpha receptor	PTGFR	module2	DB01160	Dinoprost tromethamine
Prostaglandin F2-alpha receptor	PTGFR	module2	DB00905	Bimatoprost
Protein kinase C delta type	PRKCD	module2	DB00675	Tamoxifen
Protein kinase C iota type	PRKCI	module4	DB00675	Tamoxifen
Proto-oncogene tyrosine-protein kinase Src	SRC	module2	DB01254	Dasatinib
Receptor tyrosine-protein kinase erbB-4	ERBB4	module4	DB08916	Afatinib
Sigma non-opioid intracellular receptor 1	SIGMAR1	module4	DB11186	Pentoxyverine
Sigma non-opioid intracellular receptor 1	SIGMAR1	module4	DB00652	Pentazocine
Sigma non-opioid intracellular receptor 1	SIGMAR1	module4	DB00514	Dextromethorphan
Sodium/potassium-transporting ATPase subunit alpha-1	ATP1A1	module2	DB01092	Ouabain
Sodium/potassium-transporting ATPase subunit alpha-1	ATP1A1	module2	DB00903	Etacrynic acid
Sodium/potassium-transporting ATPase subunit alpha-1	ATP1A1	module2	DB00390	Digoxin
Sodium/potassium-transporting ATPase subunit alpha-1	ATP1A1	module2	DB01396	Digitoxin
Sodium/potassium-transporting ATPase subunit alpha-1	ATP1A1	module2	DB01078	Deslanoside
Sodium/potassium-transporting ATPase subunit alpha-1	ATP1A1	module2	DB01188	Ciclopirox
Sodium/potassium-transporting ATPase subunit alpha-1	ATP1A1	module2	DB01158	Bretylium
Sodium/potassium-transporting ATPase subunit alpha-1	ATP1A1	module2	DB01430	Almitrine
Sodium/potassium-transporting ATPase subunit alpha-1	ATP1A1	module2	DB00511	Acetyldigitoxin
Sterol O-acyltransferase 1	SOAT1	module3	DB00973	Ezetimibe
Tissue-type plasminogen activator	PLAT	module2	DB00513	Aminocaproic acid
Transferrin receptor protein 1	TFRC	module3	DB14520	Tetraferric tricitrate decahydrate
Transferrin receptor protein 1	TFRC	module3	DB13949	Ferric cation
Vascular endothelial growth factor receptor 3	FLT4	module2	DB08896	Regorafenib
Vascular endothelial growth factor receptor 3	FLT4	module2	DB06589	Pazopanib
Vascular endothelial growth factor receptor 3	FLT4	module2	DB09079	Nintedanib
Vascular endothelial growth factor receptor 3	FLT4	module2	DB09078	Lenvatinib
Vascular endothelial growth factor receptor 3	FLT4	module2	DB06626	Axitinib
Voltage-dependent calcium channel subunit alpha-2/delta-1	CACNA2D1	module3	DB00230	Pregabalin
Voltage-dependent calcium channel subunit alpha-2/delta-1	CACNA2D1	module3	DB01054	Nitrendipine
Voltage-dependent calcium channel subunit alpha-2/delta-1	CACNA2D1	module3	DB00401	Nisoldipine
Voltage-dependent calcium channel subunit alpha-2/delta-1	CACNA2D1	module3	DB06712	Nilvadipine
Voltage-dependent calcium channel subunit alpha-2/delta-1	CACNA2D1	module3	DB00622	Nicardipine
Voltage-dependent calcium channel subunit alpha-2/delta-1	CACNA2D1	module3	DB00270	Isradipine
Voltage-dependent calcium channel subunit alpha-2/delta-1	CACNA2D1	module3	DB00996	Gabapentin
Voltage-dependent calcium channel subunit alpha-2/delta-1	CACNA2D1	module3	DB01023	Felodipine
V-type proton ATPase subunit B, brain isoform	ATP6V1B2	module3	DB05260	Gallium nitrate
* Drugs marked with red colour are in clinical trials for COVID19

## Sheet: Supp Table 10,11
Supplementary table 10: proximity between drugs in clinical trial and COVID-19 disease module
Drug	z-score	module
Enoxaparin	-3.2498	module 2
Heparin	-3.51572	module 2
Formoterol	-3.19823	module2
Amiodarone	-3.00222	module2
Rivaroxaban	-3.06403	module2
Chloroquine	-3.05553	module3
Nintedanib	-3.12148	module2
Nitrendipine	-2.89249	module3
Nicardipine	-3.12367	module3
Felodipine	-3.08464	module3
Supplementary table 11: proximity between COVID-19 disease module and drugs, targeting multiple functional module simultaneously
Drug	z-score	modules
Regorafenib	-3.06917	module1, module2
Tamoxifen	-2.96545	module1, module2, module4
afatinib	-2.53017	module2, module3
Panobinostat, Belinostat	-4.87692	module1, module4
biricodar	-4.44869	module3, module4
